# Supplementary material for: High Throughput Manufacturing of Bacteriophages Using Continuous Stirred Tank Bioreactors Connected in Series to Ensure Optimum Host Bacteria Physiology for Phage Production
Source: Viruses. 2018 Oct 1;10(10):537. doi: 10.3390/v10100537 (PMC6213498; doi:10.3390/v10100537)
Supplement: Supplementary file 1 [file viruses-10-00537-s001.pdf]

# Supplementary Information.

**Table S1.** Composition of synthetic medium.

| Name                                                | Working concentration                                                           | Sterilization method |
|-----------------------------------------------------|---------------------------------------------------------------------------------|----------------------|
| MgSO <sub>4</sub>                                   | 0.586 g L <sup>-1</sup>                                                         | 121 °C autoclave     |
| Glucose                                             | 2.94 g L <sup>-1</sup>                                                          | Filtration (0.22 µm) |
| Na <sub>2</sub> MoO <sub>4</sub> · H <sub>2</sub> O | 2.1 mg L <sup>-1</sup>                                                          | 121 °C autoclave     |
| Trace elements.                                     | 2.5mg L <sup>-1</sup> CoCl <sub>2</sub> ·6H <sub>2</sub> O                      | 121 °C autoclave.    |
| .                                                   | 15 mg L <sup>-1</sup> MnCl <sub>2</sub> ·4H <sub>2</sub> O                      | .                    |
| .                                                   | 1.5 mg L <sup>-1</sup> CuCl <sub>2</sub> ·2H <sub>2</sub> O                     | .                    |
| .                                                   | 3 mg L <sup>-1</sup> H <sub>3</sub> BO <sub>3</sub>                             | .                    |
| .                                                   | 33.8 mg L <sup>-1</sup> Zn(CH <sub>3</sub> COO) <sub>2</sub> ·2H <sub>2</sub> O | .                    |
|                                                     | 14.10 mg L <sup>-1</sup> Titriplex III                                          |                      |
| (NH <sub>4</sub> ) <sub>2</sub> HPO <sub>4</sub>    | 4 g L <sup>-1</sup>                                                             | 121 °C autoclave     |
| KH <sub>2</sub> PO <sub>4</sub>                     | 13.3 g L <sup>-1</sup>                                                          | 121 °C autoclave     |
| Citric Acid                                         | 1.5542 g L <sup>-1</sup>                                                        | 121 °C autoclave     |
| Fe(III) citrate                                     | 0.1008 g L <sup>-1</sup>                                                        | 121 °C autoclave     |
| Trizma Base                                         | To bring pH to 7                                                                | 121 °C autoclave     |

**Table S2.** Summary of experimental runs. (a) changing dilution rate in host propagation reactor (R1) to control host bacterium physiology; (b) changing different dilution rates in R1 to affect host bacterium physiology and investigate the effect of this on phage productivity in reactor (R2) with R2 operated at a constant dilution rate 4 hr<sup>-1</sup>; (c) experiment runs to investigate the effect of constant host physiology (dilution rates in R1 fixed at either 0.4 hr<sup>-1</sup>, 0.5 hr<sup>-1</sup> or 0.6 hr<sup>-1</sup>) and changing dilution rates in R2 to study effect on phage titres in R2.

(a).

| Dilution rate R1, hr <sup>-1</sup> | Flow rate mL hr <sup>-1</sup> | Volume R1<br>mL | Residence time in R1, hr |
|------------------------------------|-------------------------------|-----------------|--------------------------|
| 0.1                                | 50                            | 500             | 10                       |
| 0.2                                | 100                           | 500             | 5                        |
| 0.3                                | 150                           | 500             | 3.33                     |
| 0.4                                | 200                           | 500             | 2.5                      |
| 0.5                                | 250                           | 500             | 2                        |
| 0.6                                | 300                           | 500             | 1.6                      |

(b).

| Dilution rate R1<br>(hr <sup>-1</sup> ) | Dilution rate R2<br>(hr <sup>-1</sup> ) | Flow rate<br>(mL/hr) | Volume<br>R2<br>(mL) | Residence time in R2<br>(min) |
|-----------------------------------------|-----------------------------------------|----------------------|----------------------|-------------------------------|
| 0.1                                     | 4                                       | 50                   | 12.5                 | 15                            |
| 0.2                                     | 4                                       | 100                  | 25                   | 15                            |
| 0.3                                     | 4                                       | 150                  | 37.5                 | 15                            |
| 0.4                                     | 4                                       | 200                  | 50                   | 15                            |
| 0.5                                     | 4                                       | 250                  | 62.5                 | 15                            |
| 0.6                                     | 4                                       | 300                  | 75                   | 15                            |

(c).

| Dilution rate R1<br>(hr <sup>-1</sup> ) | Dilution rate R2<br>(hr <sup>-1</sup> ) | Flow rate<br>(mL/hr) | Volume<br>R2<br>(mL) | Residence time in R2<br>(min) |
|-----------------------------------------|-----------------------------------------|----------------------|----------------------|-------------------------------|
| 0.4                                     | 3                                       | 200                  | 67                   | 20                            |

|     |   |     |      |    |
|-----|---|-----|------|----|
| 0.4 | 4 | 200 | 50   | 15 |
| 0.4 | 6 | 200 | 33.3 | 10 |
| 0.5 | 3 | 250 | 83.3 | 20 |
| 0.5 | 4 | 250 | 62.5 | 15 |
| 0.5 | 6 | 250 | 42   | 10 |
| 0.6 | 3 | 300 | 100  | 20 |
| 0.6 | 4 | 300 | 75   | 15 |
| 0.6 | 6 | 300 | 50   | 10 |

**Table S3.** Phage titre  $P_3$  amplification in bioreactor R3,  $D_1$  0.5  $\text{hr}^{-1}$ ,  $C_2 = 1.1 \times 10^7$  CFU  $\text{mL}^{-1}$ . Time 0 hr represents phage titre inlet conditions to R3.

| Time, hr | $D_2$ 3 $\text{hr}^{-1}$   |                              | $D_2$ 6 $\text{hr}^{-1}$   |                              |
|----------|----------------------------|------------------------------|----------------------------|------------------------------|
|          | Glucose, g $\text{L}^{-1}$ | $P_3$ , PFU $\text{mL}^{-1}$ | Glucose, g $\text{L}^{-1}$ | $P_3$ , PFU $\text{mL}^{-1}$ |
| 0        | 0.72                       | $3.8 \times 10^8$            | 0.86                       | $2.1 \times 10^6$            |
| 1        | 0.70                       | $1.5 \times 10^{11}$         | 0.64                       | $7 \times 10^8$              |
| 2        | 0.64                       | $2.7 \times 10^{11}$         | 0.20                       | $2.3 \times 10^{10}$         |

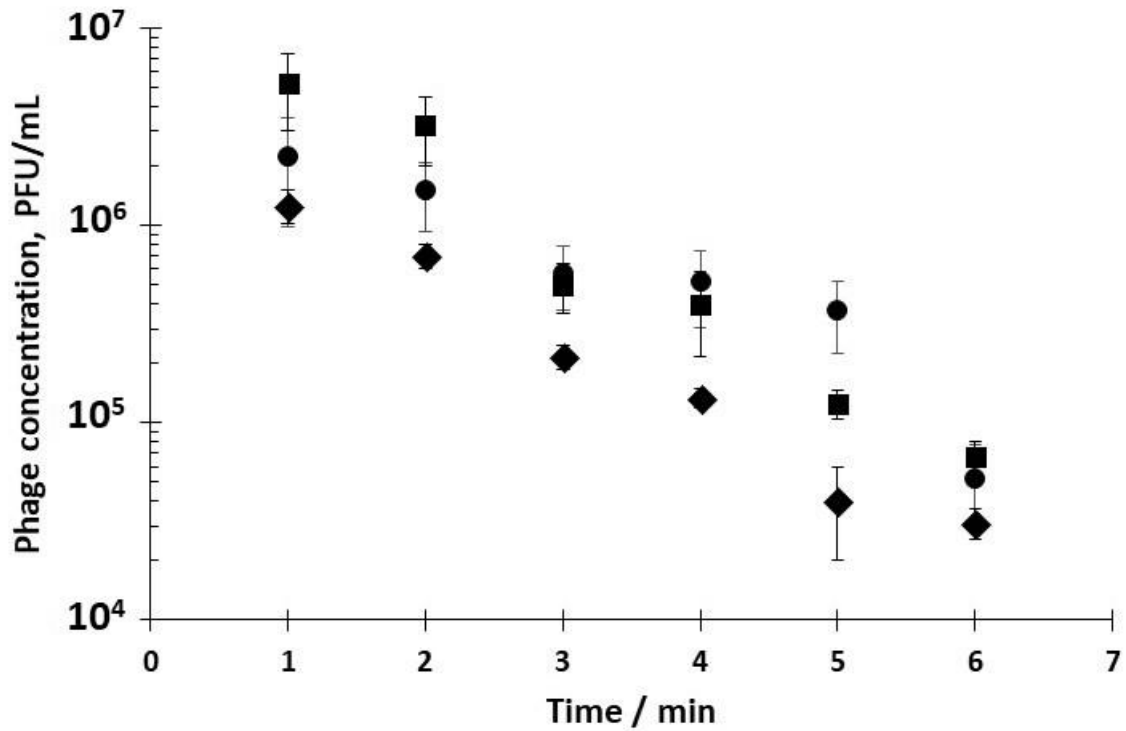

**Figure S1.** Rates of adsorption of *E. coli* T3 phage to exponentially growing host bacteria in chemostat R1 at dilution rates 0.4  $\text{hr}^{-1}$  (squares), phage adsorption rate estimated using linear least squares fit ( $\delta$ )  $1.8 \times 10^{-9}$  L  $\text{hr}^{-1}$  ( $r^2$  0.964), 0.5  $\text{hr}^{-1}$  (circles) phage adsorption rate ( $\delta$ )  $3.6 \times 10^{-9}$  L  $\text{hr}^{-1}$  ( $r^2$  0.877), and 0.6  $\text{hr}^{-1}$  (diamonds) phage adsorption rate ( $\delta$ )  $9 \times 10^{-9}$  L  $\text{hr}^{-1}$  ( $r^2$  0.868). Error bars represent one standard deviation.

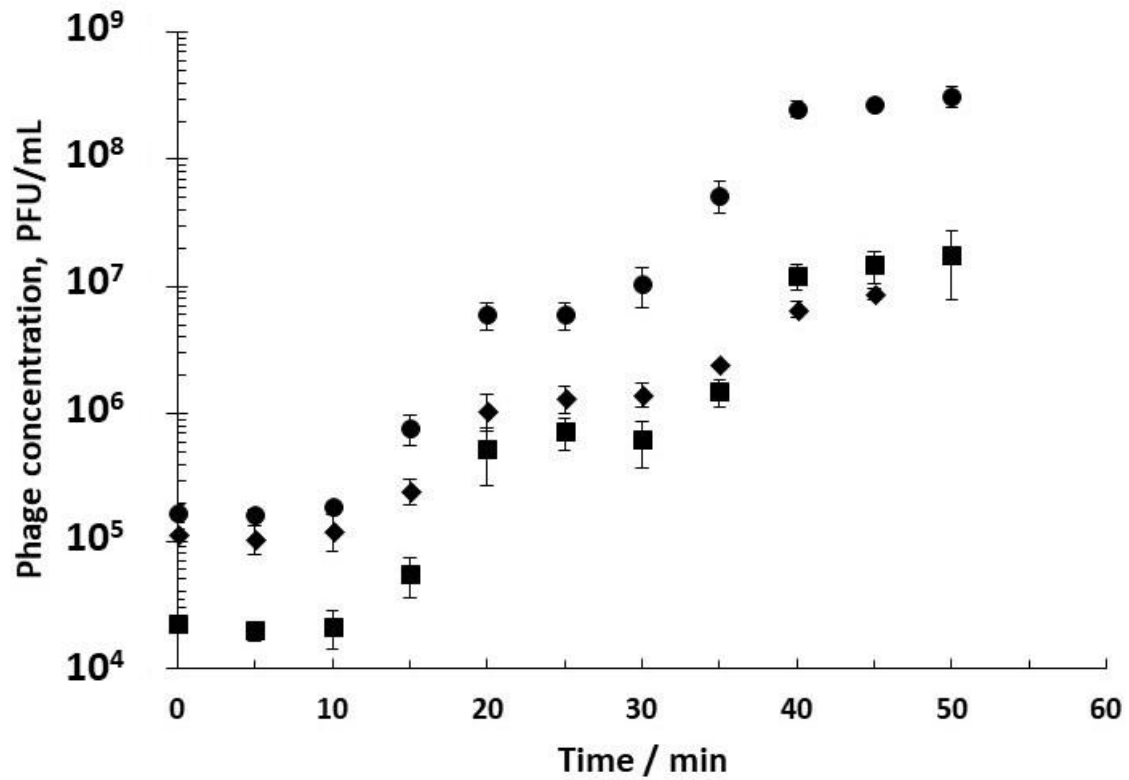

**Figure S2.** *E. coli* T3 phage development (one step growth) in single infections of steady-state exponentially growing *E. coli* host bacteria in chemostat R1 at dilution rates 0.4 hr<sup>-1</sup> (squares), burst size ~ 20, 0.5 hr<sup>-1</sup> (circles) burst size ~ 40 and 0.6 hr<sup>-1</sup> (diamonds) burst size ~ 10. Error bars represent one standard deviation.

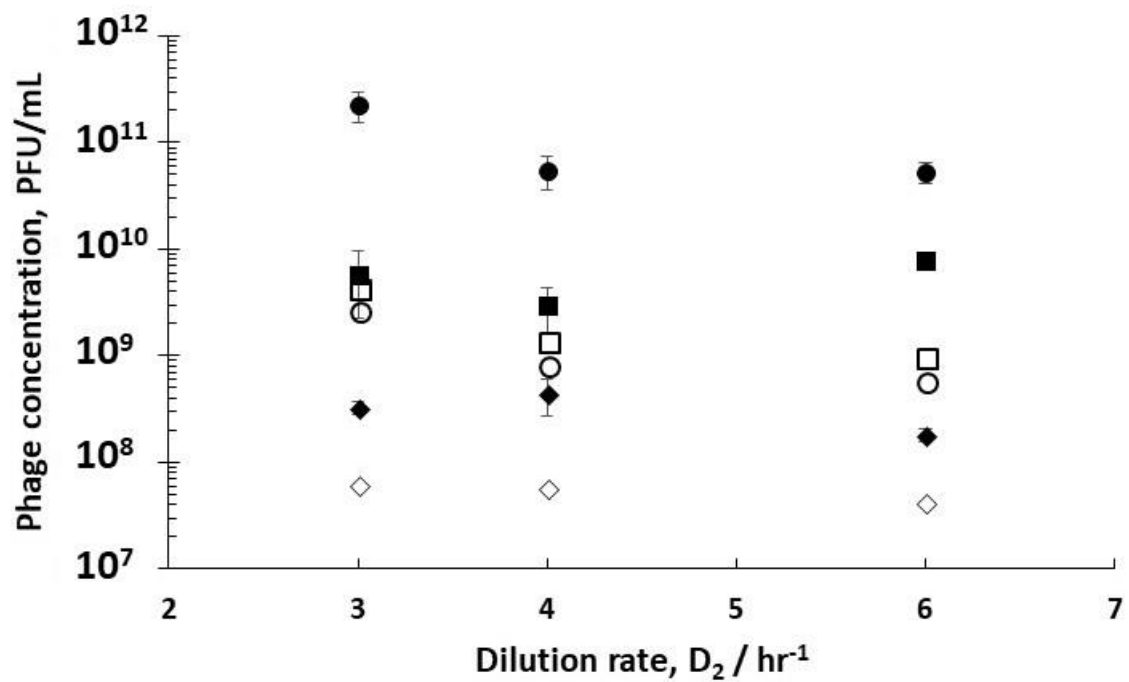

**Figure S3.** Simulation results showing modelling fit of final phage titres in reactor R3 using output conditions from reactor R2 as inlet conditions for semi-batch operation of R3. Filled squares (■)

correspond to phages infected in R2 when R1 was operated at  $D_1 = 0.4 \text{ hr}^{-1}$ , Open squares ( $\square$ ) correspond to simulation results at  $D_1 = 0.4 \text{ hr}^{-1}$  using a burst size of 20 and lag time of 10 min. Inlet conditions used for simulations were:  $C_2 = 4 \times 10^{10} \text{ CFU L}^{-1}$ ,  $P_2 [3.0 \times 10^{11}, 8.3 \times 10^9, 1.7 \times 10^8] \text{ PFU l}^{-1}$  corresponding to  $D_2 [3, 4, 6]$ ,  $S_2 = 1.1 \text{ g L}^{-1}$ . Filled round circles ( $\bullet$ ) correspond to phages infected in R2 when R1 was operated at  $D_1 = 0.5 \text{ hr}^{-1}$ ; Open round circles ( $\circ$ ) correspond to simulation results at  $D_1 = 0.5 \text{ hr}^{-1}$  using a burst size of 40 and lag time of 10 min. Inlet conditions used for simulations were:  $C_2 = 1 \times 10^{10} \text{ CFU L}^{-1}$ ,  $P_2 [3.8 \times 10^{11}, 2.6 \times 10^{10}, 2.1 \times 10^9] \text{ PFU l}^{-1}$  corresponding to  $D_2 [3, 4, 6]$ ,  $S_2 = 1.5 \text{ g L}^{-1}$ . Filled diamonds ( $\blacklozenge$ ) correspond to phages infected in R2 when R1 was operated at  $D_1 = 0.6 \text{ hr}^{-1}$ ; Open diamonds ( $\lozenge$ ) correspond to simulation results at  $D_1 = 0.6 \text{ hr}^{-1}$  using a burst size of 10 and lag time of 10 min. Inlet conditions used for simulations were:  $C_2 = 3.7 \times 10^9 \text{ CFU L}^{-1}$ ,  $P_2 [1 \times 10^{10}, 8 \times 10^9, 7 \times 10^7] \text{ PFU l}^{-1}$  corresponding to  $D_2 [3, 4, 6]$ ,  $S_2 = 2.3 \text{ g L}^{-1}$ . Other simulation parameters used for all simulations were:  $\delta = 3.6 \times 10^{-9} \text{ L hr}^{-1}$  and the semi-batch reactor inlet flow rate used was  $0.25 \text{ L hr}^{-1}$ .
